# Supplementary material for: Red blood cell distribution width and peritoneal dialysis-associated peritonitis prognosis
Source: PubMed Central journal article supplement (PMC7946038; doi:10.1080/0886022x.2020.1786401), 2020-07-02
Supplement: IRNF_A_1786401_SM0250.pdf [file IRNF_A_1786401_SM0250.pdf]

# Red Blood Cell Distribution Width and Peritoneal Dialysis-Associated Peritonitis Prognosis

## (Supplemental Tables)

**Supplemental Table S1.** Clinical characteristics of 337 episodes of peritonitis

| Characteristics                          | Success       | Failure       | Overall       |
|------------------------------------------|---------------|---------------|---------------|
| No. of episodes                          | 265           | 72            | 337           |
| Age, yr                                  | 44 (21)       | 48 (20)       | 45 (21)       |
| Men, no. (%)                             | 154 (58.11)   | 44 (61.11)    | 198 (58.8)    |
| Hypertension, no. (%)                    | 244 (92.1)    | 65 (90.3)     | 309 (91.7)    |
| Diabetes mellitus, no. (%)               | 28 (10.57)    | 7 (9.72)      | 35 (10.4)     |
| Coronary artery disease, no. (%)         | 80 (30.2)     | 25 (34.7)     | 105 (31.2)    |
| Duration on PD, month                    | 15 (24)       | 20 (27)       | 16 (25)       |
| Residual urine volume, ml/24h            | 300 (850)     | 200 (1000)    | 300 (900)     |
| Red blood cell, 10 <sup>12</sup> /liter  | 3.19 ± 0.72   | 3.17 ± 0.71   | 3.19 ± 0.72   |
| White blood cell, 10 <sup>9</sup> /liter | 5.98 (3.78)   | 6.20 (4.20)   | 6.04 (3.78)   |
| Platelet, 10 <sup>9</sup> /liter         | 200 (117)     | 223 (99)      | 204 (114)     |
| Hemoglobin, g/liter                      | 94.67 ± 20.02 | 94.22 ± 21.09 | 94.58 ± 20.22 |
| Albumin, g/liter                         | 28.66 ± 6.92  | 26.87 ± 6.67  | 28.28 ± 6.89  |
| Serum creatinin, umol/liter              | 706 (305)     | 735.5 (390.5) | 708 (326)     |
| Serum uric acid, umol/liter              | 321.5 (116)   | 312 (93)      | 320 (112)     |
| Cholesterol, mmol/liter                  | 3.77 (1.35)   | 3.65 (1.08)   | 3.74 (1.34)   |
| Ferritin, ug/liter                       | 329 (364)     | 479 (468)     | 353 (416)     |
| Potassium, mmol/liter                    | 3.76 (0.99)   | 3.84 (1.23)   | 3.78 (1.08)   |
| Phosphorus, mmol/liter                   | 1.31 (0.60)   | 1.27 (0.41)   | 1.30 (0.57)   |
| Calcium, mmol/liter                      | 2.00 (0.23)   | 1.99 (0.30)   | 2.00 (0.26)   |

|                                                                |                    |                    |                    |
|----------------------------------------------------------------|--------------------|--------------------|--------------------|
| Parathormone, ng/liter                                         | 204.30<br>(217.80) | 213.75<br>(190.73) | 204.80<br>(203.50) |
| Dialysate white blood cell on day 3,<br>10 <sup>6</sup> /liter | 129 (299)          | 245 (1250)         | 153 (436)          |
| Infection type, no. (%)                                        |                    |                    |                    |
| Gram-positive                                                  | 167 (63.02)        | 35 (48.61)         | 202 (59.9)         |
| Gram-negative                                                  | 43 (16.23)         | 18 (25.00)         | 61 (18.1)          |
| Culture negative                                               | 55 (20.75)         | 19 (26.39)         | 74 (22.0)          |

---

Abbreviations: RDW, red blood cell distribution width; PD, peritoneal dialysis.

**Supplemental Table S2.** univariate analyses of independent risk factors related to treatment failure

| Variables                                                   | Routine Logistic Regression |              |                   | Generalized Estimated Equation |              |                   |
|-------------------------------------------------------------|-----------------------------|--------------|-------------------|--------------------------------|--------------|-------------------|
|                                                             | Odds Ratios                 | 95% CI       | P value           | Odds Ratios                    | 95% CI       | P value           |
| RDW, per 1% increase                                        | 1.45                        | 1.20 to 1.75 | <b>&lt; 0.001</b> | 1.44                           | 1.21 to 1.72 | <b>&lt; 0.001</b> |
| Age, per 10 yr increase                                     | 1.16                        | 0.96 to 1.41 | <b>0.117</b>      | 1.13                           | 0.93 to 1.38 | 0.210             |
| Gender (female)                                             | 0.88                        | 0.52 to 1.50 | 0.647             | 0.91                           | 0.52 to 1.59 | 0.745             |
| Hypertension (yes)                                          | 0.80                        | 0.33 to 1.96 | 0.625             | 0.72                           | 0.25 to 2.03 | 0.531             |
| Diabetic status (yes)                                       | 0.91                        | 0.38 to 2.18 | 0.835             | 0.87                           | 0.36 to 2.12 | 0.764             |
| Coronary artery disease (yes)                               | 1.23                        | 0.71 to 2.13 | 0.462             | 1.14                           | 0.62 to 2.08 | 0.676             |
| Duration, per 1 yr increase                                 | 1.16                        | 0.99 to 1.36 | <b>0.061</b>      | 1.20                           | 1.02 to 1.42 | <b>0.027</b>      |
| Residual urine volume, per 100 ml/24h increase              | 1.00                        | 0.95 to 1.04 | 0.836             | 0.99                           | 0.94 to 1.04 | 0.637             |
| Red blood cell count, per 10 <sup>12</sup> /liter increase  | 0.96                        | 0.67 to 1.38 | 0.820             | 0.93                           | 0.63 to 1.38 | 0.716             |
| White blood cell count, per 10 <sup>9</sup> /liter increase | 1.05                        | 0.97 to 1.14 | 0.217             | 1.07                           | 0.99 to 1.16 | <b>0.092</b>      |
| Platelet, per 10 <sup>11</sup> /liter increase              | 1.06                        | 0.87 to 1.28 | 0.580             | 1.06                           | 0.91 to 1.25 | 0.454             |
| Hemoglobin, per 10 g/liter increase                         | 0.99                        | 0.87 to 1.13 | 0.867             | 0.98                           | 0.84 to 1.14 | 0.764             |
| Alubmin, per 10 g/liter increase                            | 0.68                        | 0.46 to 1.00 | <b>0.052</b>      | 0.68                           | 0.46 to 1.00 | <b>0.049</b>      |
| Creatinin, per 100 ummol/liter increase                     | 1.01                        | 0.91 to 1.12 | 0.885             | 1.03                           | 0.91 to 1.16 | 0.659             |
| Uric acid, per 100 ummol/liter increase                     | 1.02                        | 0.77 to 1.35 | 0.886             | 1.05                           | 0.81 to 1.36 | 0.704             |
| Cholesterol, per 1 mmol/liter increase                      | 0.84                        | 0.63 to 1.13 | 0.257             | 0.83                           | 0.62 to 1.12 | 0.220             |
| Potassium, per 1 mmol/liter increase                        | 1.10                        | 0.81 to 1.49 | 0.553             | 1.19                           | 0.86 to 1.63 | 0.299             |

|                                              |      |              |              |      |              |              |
|----------------------------------------------|------|--------------|--------------|------|--------------|--------------|
| Phosphorus, per 1 mmol/liter increase        | 1.10 | 0.60 to 2.03 | 0.748        | 1.20 | 0.65 to 2.22 | 0.556        |
| Parathormone, per 100 ng/liter increase      | 0.97 | 0.84 to 1.11 | 0.619        | 0.97 | 0.85 to 1.10 | 0.622        |
| Ferritin, per 100 ug/liter increase          | 1.05 | 1.00 to 1.11 | <b>0.049</b> | 1.05 | 1.01 to 1.10 | <b>0.030</b> |
| Dialysate WBC on day 3, per 1000/ul increase | 1.32 | 1.11 to 1.56 | <b>0.002</b> | 1.28 | 1.08 to 1.53 | <b>0.005</b> |
| Infection type                               |      |              |              |      |              |              |
| <i>Gram-positive peritonitis</i>             | 1.00 | referent     | —            | 1.00 | referent     | —            |
| <i>Gram-negative peritonitis</i>             | 2.00 | 1.03 to 3.86 | <b>0.040</b> | 1.77 | 0.89 to 3.54 | <b>0.105</b> |
| <i>Culture negative peritonitis</i>          | 1.65 | 0.87 to 3.11 | <b>0.124</b> | 1.64 | 0.84 to 3.22 | <b>0.148</b> |

---

**Supplemental Table S3.** Sensitivity analyses for the predictive performance of model A and model B

| <b>Adverse Events</b>         | <b>Patient No.<br/>events/total</b> | <b>Adjusted ORs<sup>c</sup><br/>(95% CI)</b> | <b>AUC<br/>(95% CI)</b> | <b>Sensitivity</b> | <b>Specificity</b> |
|-------------------------------|-------------------------------------|----------------------------------------------|-------------------------|--------------------|--------------------|
| <b>Treatment failure</b>      | 72/337                              |                                              |                         |                    |                    |
| Model A <sup>a</sup>          |                                     | 1.35 (1.10 to 1.67)                          | 0.67 (0.59 to 0.75)     | 0.46               | 0.81               |
| Model B <sup>b</sup>          |                                     | 1.40 (1.12 to 1.74)                          | 0.72 (0.64 to 0.80)     | 0.61               | 0.75               |
| <b>Catheter removal/death</b> | 46/337                              |                                              |                         |                    |                    |
| Model A <sup>a</sup>          |                                     | 1.51 (1.18 to 1.92)                          | 0.71 (0.62 to 0.80)     | 0.59               | 0.76               |
| Model B <sup>b</sup>          |                                     | 1.61 (1.23 to 2.09)                          | 0.78 (0.70 to 0.87)     | 0.79               | 0.63               |
| <b>Catheter removal</b>       | 39/330                              |                                              |                         |                    |                    |
| Model A <sup>a</sup>          |                                     | 1.63 (1.25 to 2.12)                          | 0.72 (0.62 to 0.81)     | 0.81               | 0.54               |
| Model B <sup>b</sup>          |                                     | 1.66 (1.26 to 2.19)                          | 0.77 (0.67 to 0.86)     | 0.86               | 0.53               |
| <b>Relapse/recurrence</b>     | 26/291                              |                                              |                         |                    |                    |
| Model A <sup>a</sup>          |                                     | 1.10 (0.77 to 1.55)                          | 0.61 (0.48 to 0.74)     | 0.41               | 0.81               |
| Model B <sup>b</sup>          |                                     | 1.12 (0.79 to 1.59)                          | 0.62 (0.48 to 0.76)     | 0.41               | 0.90               |

Model A<sup>a</sup>, included baseline red blood cell distribution width (RDW), age, duration on peritoneal dialysis (PD), albumin, and ferritin.

Model B<sup>b</sup>, included baseline RDW, age, duration on PD, albumin, ferritin, and dialysate white blood cell count on day 3.

C, adjusted odds ratios of baseline RDW in models.

Abbreviations: CI, confidence interval; OR, odds ratio; ROC, receiver operating characteristic curve.
